# Supplementary material
Source: Springer Nature journal article supplement (https://www.springermedizin.de/resource/supplementary/12985_2010_926_MOESM4_ESM.pdf/9608754)

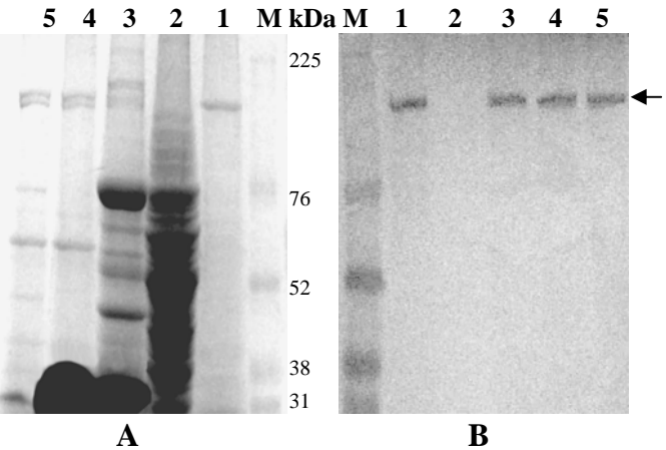

Supplement: MOESM4 [file 9608754]
